# Supplementary material for: N-Iodopyridinium Cations: Kinetic Trapping as Sulfonate Complexes
Source: Research Square preprint supplement (doi:10.21203/rs.3.rs-3436889/v1), 2023-10-30

```
R(reflections)= 0.0337( 1279)      wR2(reflections)=
S = 1.126                        0.0886( 1356)
Npar= 144
```

---

The following ALERTS were generated. Each ALERT has the format

**test-name\_ALERT\_alert-type\_alert-level.**

Click on the hyperlinks for more details of the test.

---

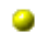

#### Alert level C

|                   |                                                  |              |
|-------------------|--------------------------------------------------|--------------|
| PLAT042_ALERT_1_C | Calc. and Reported MoietyFormula Strings Differ  | Please Check |
| PLAT088_ALERT_3_C | Poor Data / Parameter Ratio .....                | 9.42 Note    |
| PLAT911_ALERT_3_C | Missing FCF Refl Between Thmin & STh/L= 0.596    | 5 Report     |
| PLAT934_ALERT_3_C | Number of (Iobs-Icalc)/Sigma(W) > 10 Outliers .. | 1 Check      |

---

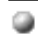

#### Alert level G

|                   |                                                  |                |           |
|-------------------|--------------------------------------------------|----------------|-----------|
| PLAT300_ALERT_4_G | Atom Site Occupancy of S1                        | Constrained at | 0.5 Check |
| PLAT300_ALERT_4_G | Atom Site Occupancy of O2                        | Constrained at | 0.5 Check |
| PLAT300_ALERT_4_G | Atom Site Occupancy of O3                        | Constrained at | 0.5 Check |
| PLAT300_ALERT_4_G | Atom Site Occupancy of N1                        | Constrained at | 0.5 Check |
| PLAT300_ALERT_4_G | Atom Site Occupancy of C1                        | Constrained at | 0.5 Check |
| PLAT300_ALERT_4_G | Atom Site Occupancy of C2                        | Constrained at | 0.5 Check |
| PLAT300_ALERT_4_G | Atom Site Occupancy of C3                        | Constrained at | 0.5 Check |
| PLAT300_ALERT_4_G | Atom Site Occupancy of C4                        | Constrained at | 0.5 Check |
| PLAT300_ALERT_4_G | Atom Site Occupancy of C5                        | Constrained at | 0.5 Check |
| PLAT300_ALERT_4_G | Atom Site Occupancy of C6                        | Constrained at | 0.5 Check |
| PLAT300_ALERT_4_G | Atom Site Occupancy of C7                        | Constrained at | 0.5 Check |
| PLAT300_ALERT_4_G | Atom Site Occupancy of C8                        | Constrained at | 0.5 Check |
| PLAT300_ALERT_4_G | Atom Site Occupancy of C9                        | Constrained at | 0.5 Check |
| PLAT300_ALERT_4_G | Atom Site Occupancy of C10                       | Constrained at | 0.5 Check |
| PLAT300_ALERT_4_G | Atom Site Occupancy of C11                       | Constrained at | 0.5 Check |
| PLAT300_ALERT_4_G | Atom Site Occupancy of C12                       | Constrained at | 0.5 Check |
| PLAT300_ALERT_4_G | Atom Site Occupancy of C13                       | Constrained at | 0.5 Check |
| PLAT300_ALERT_4_G | Atom Site Occupancy of H1                        | Constrained at | 0.5 Check |
| PLAT300_ALERT_4_G | Atom Site Occupancy of H2                        | Constrained at | 0.5 Check |
| PLAT300_ALERT_4_G | Atom Site Occupancy of H4                        | Constrained at | 0.5 Check |
| PLAT300_ALERT_4_G | Atom Site Occupancy of H5                        | Constrained at | 0.5 Check |
| PLAT300_ALERT_4_G | Atom Site Occupancy of H6A                       | Constrained at | 0.5 Check |
| PLAT300_ALERT_4_G | Atom Site Occupancy of H6B                       | Constrained at | 0.5 Check |
| PLAT300_ALERT_4_G | Atom Site Occupancy of H6C                       | Constrained at | 0.5 Check |
| PLAT300_ALERT_4_G | Atom Site Occupancy of H8                        | Constrained at | 0.5 Check |
| PLAT300_ALERT_4_G | Atom Site Occupancy of H9                        | Constrained at | 0.5 Check |
| PLAT300_ALERT_4_G | Atom Site Occupancy of H11                       | Constrained at | 0.5 Check |
| PLAT300_ALERT_4_G | Atom Site Occupancy of H12                       | Constrained at | 0.5 Check |
| PLAT300_ALERT_4_G | Atom Site Occupancy of H13A                      | Constrained at | 0.5 Check |
| PLAT300_ALERT_4_G | Atom Site Occupancy of H13B                      | Constrained at | 0.5 Check |
| PLAT300_ALERT_4_G | Atom Site Occupancy of H13C                      | Constrained at | 0.5 Check |
| PLAT301_ALERT_3_G | Main Residue Disorder .....(Resd 1 )             | 81% Note       |           |
| PLAT789_ALERT_4_G | Atoms with Negative _atom_site_disorder_group #  | 31 Check       |           |
| PLAT811_ALERT_5_G | No ADDSYM Analysis: Too Many Excluded Atoms .... | ! Info         |           |
| PLAT822_ALERT_4_G | CIF-embedded .res Contains Negative PART Numbers | 4 Check        |           |
| PLAT883_ALERT_1_G | No Info/Value for _atom_sites_solution_primary . | Please Do !    |           |
| PLAT909_ALERT_3_G | Percentage of I>2sig(I) Data at Theta(Max) Still | 90% Note       |           |
| PLAT941_ALERT_3_G | Average HKL Measurement Multiplicity .....       | 3.5 Low        |           |
| PLAT967_ALERT_5_G | Note: Two-Theta Cutoff Value in Embedded .res .. | 133.5 Degree   |           |

---

0 **ALERT level A** = Most likely a serious problem - resolve or explain

0 **ALERT level B** = A potentially serious problem, consider carefully

4 **ALERT level C** = Check. Ensure it is not caused by an omission or oversight  
39 **ALERT level G** = General information/check it is not something unexpected

2 ALERT type 1 CIF construction/syntax error, inconsistent or missing data  
0 ALERT type 2 Indicator that the structure model may be wrong or deficient  
6 ALERT type 3 Indicator that the structure quality may be low  
33 ALERT type 4 Improvement, methodology, query or suggestion  
2 ALERT type 5 Informative message, check

---

It is advisable to attempt to resolve as many as possible of the alerts in all categories. Often the minor alerts point to easily fixed oversights, errors and omissions in your CIF or refinement strategy, so attention to these fine details can be worthwhile. In order to resolve some of the more serious problems it may be necessary to carry out additional measurements or structure refinements. However, the purpose of your study may justify the reported deviations and the more serious of these should normally be commented upon in the discussion or experimental section of a paper or in the "special\_details" fields of the CIF. checkCIF was carefully designed to identify outliers and unusual parameters, but every test has its limitations and alerts that are not important in a particular case may appear. Conversely, the absence of alerts does not guarantee there are no aspects of the results needing attention. It is up to the individual to critically assess their own results and, if necessary, seek expert advice.

### **Publication of your CIF in IUCr journals**

A basic structural check has been run on your CIF. These basic checks will be run on all CIFs submitted for publication in IUCr journals (*Acta Crystallographica*, *Journal of Applied Crystallography*, *Journal of Synchrotron Radiation*); however, if you intend to submit to *Acta Crystallographica Section C* or *E* or *IUCrData*, you should make sure that full publication checks are run on the final version of your CIF prior to submission.

### **Publication of your CIF in other journals**

Please refer to the *Notes for Authors* of the relevant journal for any special instructions relating to CIF submission.

---

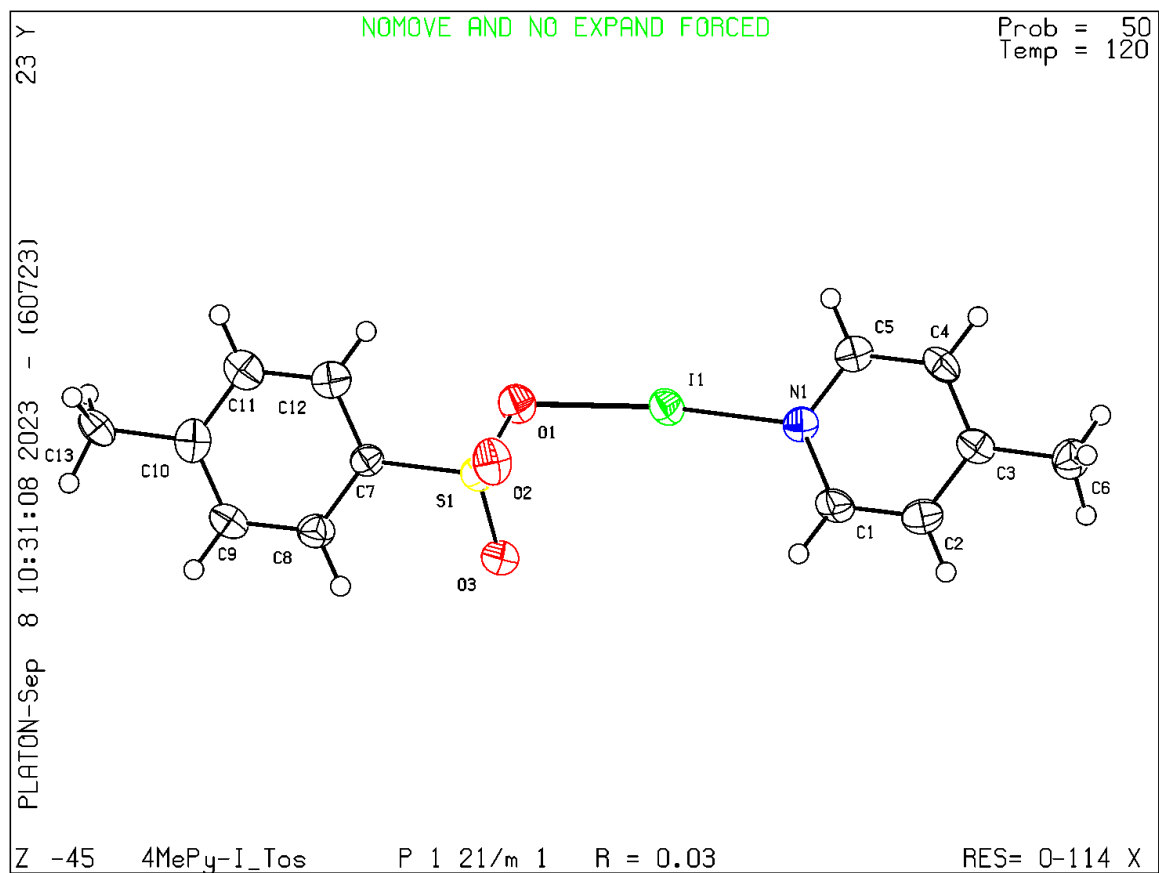

Supplement: Supplementary file 10 [file (4MePy-I)Tos_checkcif.pdf › Cifs final/(4MePy-I)Tos_checkcif.pdf]
