# Supplementary material for: N-Iodopyridinium Cations: Kinetic Trapping as Sulfonate Complexes
Source: Research Square preprint supplement (doi:10.21203/rs.3.rs-3436889/v1), 2023-10-30

```
R(reflections)= 0.1288( 3708)      wR2(reflections)=
S = 1.824                        0.3838( 3986)
Npar= 203
```

---

The following ALERTS were generated. Each ALERT has the format

**test-name\_ALERT\_alert-type\_alert-level.**

Click on the hyperlinks for more details of the test.

---

### Alert level A

|                   |                                     |                 |       |       |
|-------------------|-------------------------------------|-----------------|-------|-------|
| PLAT029_ALERT_3_A | _diffn_measured_fraction_theta_full | value Low       | 0.937 | Why?  |
| PLAT934_ALERT_3_A | Number of (Iobs-Icalc)/Sigma(W)     | > 10 Outliers   | 11    | Check |
| PLAT971_ALERT_2_A | Check Calcd Resid. Dens.            | 1.08Ang From I1 | 8.11  | eA-3  |
| PLAT971_ALERT_2_A | Check Calcd Resid. Dens.            | 1.06Ang From I1 | 7.57  | eA-3  |
| PLAT971_ALERT_2_A | Check Calcd Resid. Dens.            | 1.12Ang From I3 | 7.24  | eA-3  |
| PLAT971_ALERT_2_A | Check Calcd Resid. Dens.            | 1.13Ang From I4 | 6.90  | eA-3  |
| PLAT971_ALERT_2_A | Check Calcd Resid. Dens.            | 1.04Ang From I3 | 6.52  | eA-3  |
| PLAT971_ALERT_2_A | Check Calcd Resid. Dens.            | 1.11Ang From I2 | 6.47  | eA-3  |
| PLAT971_ALERT_2_A | Check Calcd Resid. Dens.            | 1.17Ang From I4 | 6.39  | eA-3  |
| PLAT971_ALERT_2_A | Check Calcd Resid. Dens.            | 1.05Ang From I2 | 6.36  | eA-3  |
| PLAT971_ALERT_2_A | Check Calcd Resid. Dens.            | 2.50Ang From C5 | 4.10  | eA-3  |

---

### Alert level B

|                                               |                                                          |                 |       |        |
|-----------------------------------------------|----------------------------------------------------------|-----------------|-------|--------|
| SHFSU01_ALERT_2_B                             | The absolute value of parameter shift to su ratio > 0.10 |                 |       |        |
|                                               | Absolute value of the parameter shift to su ratio given  |                 |       | 0.199  |
| Additional refinement cycles may be required. |                                                          |                 |       |        |
| PLAT080_ALERT_2_B                             | Maximum Shift/Error                                      |                 | 0.20  | Why ?  |
| PLAT084_ALERT_3_B                             | High wR2 Value (i.e. > 0.25)                             |                 | 0.38  | Report |
| PLAT097_ALERT_2_B                             | Large Reported Max. (Positive) Residual Density          |                 | 7.14  | eA-3   |
| PLAT972_ALERT_2_B                             | Check Calcd Resid. Dens.                                 | 0.74Ang From I1 | -3.41 | eA-3   |
| PLAT972_ALERT_2_B                             | Check Calcd Resid. Dens.                                 | 0.67Ang From I4 | -3.21 | eA-3   |
| PLAT972_ALERT_2_B                             | Check Calcd Resid. Dens.                                 | 0.74Ang From I4 | -3.04 | eA-3   |
| PLAT972_ALERT_2_B                             | Check Calcd Resid. Dens.                                 | 0.66Ang From I4 | -2.97 | eA-3   |
| PLAT972_ALERT_2_B                             | Check Calcd Resid. Dens.                                 | 0.75Ang From I3 | -2.92 | eA-3   |
| PLAT972_ALERT_2_B                             | Check Calcd Resid. Dens.                                 | 0.73Ang From I2 | -2.68 | eA-3   |
| PLAT972_ALERT_2_B                             | Check Calcd Resid. Dens.                                 | 0.70Ang From I3 | -2.51 | eA-3   |
| PLAT972_ALERT_2_B                             | Check Calcd Resid. Dens.                                 | 1.30Ang From I2 | -2.51 | eA-3   |

---

### Alert level C

|                                              |                                                   |                  |        |        |
|----------------------------------------------|---------------------------------------------------|------------------|--------|--------|
| DIFMX02_ALERT_1_C                            | The maximum difference density is > 0.1*ZMAX*0.75 |                  |        |        |
| The relevant atom site should be identified. |                                                   |                  |        |        |
| PLAT082_ALERT_2_C                            | High R1 Value                                     |                  | 0.13   | Report |
| PLAT094_ALERT_2_C                            | Ratio of Maximum / Minimum Residual Density       |                  | 2.26   | Report |
| PLAT234_ALERT_4_C                            | Large Hirshfeld Difference C8                     | --C9             | 0.16   | Ang.   |
| PLAT342_ALERT_3_C                            | Low Bond Precision on C-C Bonds                   |                  | 0.02   | Ang.   |
| PLAT412_ALERT_2_C                            | Short Intra XH3 .. XHn                            | H2 ..H7A         | 1.87   | Ang.   |
|                                              |                                                   | x,y,z =          | 1_555  | Check  |
| PLAT413_ALERT_2_C                            | Short Inter XH3 .. XHn                            | H7B ..H13C       | 2.14   | Ang.   |
|                                              |                                                   | 1-x,1-y,1-z =    | 2_666  | Check  |
| PLAT906_ALERT_3_C                            | Large K Value in the Analysis of Variance         |                  | 13.100 | Check  |
| PLAT911_ALERT_3_C                            | Missing FCF Refl Between Thmin & STh/L=           | 0.600            | 238    | Report |
| PLAT971_ALERT_2_C                            | Check Calcd Resid. Dens.                          | 1.42Ang From N3  | 1.74   | eA-3   |
| PLAT971_ALERT_2_C                            | Check Calcd Resid. Dens.                          | 2.14Ang From C13 | 1.55   | eA-3   |
| PLAT972_ALERT_2_C                            | Check Calcd Resid. Dens.                          | 0.72Ang From I1  | -2.39  | eA-3   |
| PLAT972_ALERT_2_C                            | Check Calcd Resid. Dens.                          | 0.96Ang From I1  | -2.38  | eA-3   |
| PLAT972_ALERT_2_C                            | Check Calcd Resid. Dens.                          | 0.88Ang From C8  | -2.21  | eA-3   |
| PLAT972_ALERT_2_C                            | Check Calcd Resid. Dens.                          | 0.93Ang From I4  | -2.14  | eA-3   |

|                   |                                          |                 |            |
|-------------------|------------------------------------------|-----------------|------------|
| PLAT972_ALERT_2_C | Check Calcd Resid. Dens.                 | 0.66Ang From I3 | -2.09 eA-3 |
| PLAT972_ALERT_2_C | Check Calcd Resid. Dens.                 | 1.05Ang From I1 | -2.06 eA-3 |
| PLAT972_ALERT_2_C | Check Calcd Resid. Dens.                 | 1.17Ang From I4 | -2.05 eA-3 |
| PLAT972_ALERT_2_C | Check Calcd Resid. Dens.                 | 1.70Ang From I4 | -2.00 eA-3 |
| PLAT972_ALERT_2_C | Check Calcd Resid. Dens.                 | 0.84Ang From N3 | -1.97 eA-3 |
| PLAT972_ALERT_2_C | Check Calcd Resid. Dens.                 | 0.64Ang From I1 | -1.96 eA-3 |
| PLAT972_ALERT_2_C | Check Calcd Resid. Dens.                 | 0.92Ang From I1 | -1.88 eA-3 |
| PLAT972_ALERT_2_C | Check Calcd Resid. Dens.                 | 1.75Ang From N3 | -1.81 eA-3 |
| PLAT972_ALERT_2_C | Check Calcd Resid. Dens.                 | 0.97Ang From C5 | -1.76 eA-3 |
| PLAT972_ALERT_2_C | Check Calcd Resid. Dens.                 | 0.91Ang From C5 | -1.67 eA-3 |
| PLAT972_ALERT_2_C | Check Calcd Resid. Dens.                 | 1.32Ang From C5 | -1.67 eA-3 |
| PLAT972_ALERT_2_C | Check Calcd Resid. Dens.                 | 1.61Ang From I3 | -1.64 eA-3 |
| PLAT972_ALERT_2_C | Check Calcd Resid. Dens.                 | 1.34Ang From C7 | -1.62 eA-3 |
| PLAT977_ALERT_2_C | Check Negative Difference Density on H4  | .               | -1.12 eA-3 |
| PLAT977_ALERT_2_C | Check Negative Difference Density on H8  | .               | -1.33 eA-3 |
| PLAT977_ALERT_2_C | Check Negative Difference Density on H11 | .               | -0.55 eA-3 |
| PLAT977_ALERT_2_C | Check Negative Difference Density on H12 | .               | -0.64 eA-3 |

---

### ● Alert level G

|                   |                                                  |             |
|-------------------|--------------------------------------------------|-------------|
| PLAT072_ALERT_2_G | SHELXL First Parameter in WGHT Unusually Large   | 0.20 Report |
| PLAT910_ALERT_3_G | Missing # of FCF Reflection(s) Below Theta(Min). | 1 Note      |
| PLAT912_ALERT_4_G | Missing # of FCF Reflections Above STh/L= 0.600  | 458 Note    |
| PLAT941_ALERT_3_G | Average HKL Measurement Multiplicity .....       | 2.2 Low     |
| PLAT978_ALERT_2_G | Number C-C Bonds with Positive Residual Density. | 0 Info      |

- 
- 11 **ALERT level A** = Most likely a serious problem - resolve or explain
  - 12 **ALERT level B** = A potentially serious problem, consider carefully
  - 32 **ALERT level C** = Check. Ensure it is not caused by an omission or oversight
  - 5 **ALERT level G** = General information/check it is not something unexpected
- 
- 1 ALERT type 1 CIF construction/syntax error, inconsistent or missing data
  - 49 ALERT type 2 Indicator that the structure model may be wrong or deficient
  - 8 ALERT type 3 Indicator that the structure quality may be low
  - 2 ALERT type 4 Improvement, methodology, query or suggestion
  - 0 ALERT type 5 Informative message, check
-

It is advisable to attempt to resolve as many as possible of the alerts in all categories. Often the minor alerts point to easily fixed oversights, errors and omissions in your CIF or refinement strategy, so attention to these fine details can be worthwhile. In order to resolve some of the more serious problems it may be necessary to carry out additional measurements or structure refinements. However, the purpose of your study may justify the reported deviations and the more serious of these should normally be commented upon in the discussion or experimental section of a paper or in the "special\_details" fields of the CIF. checkCIF was carefully designed to identify outliers and unusual parameters, but every test has its limitations and alerts that are not important in a particular case may appear. Conversely, the absence of alerts does not guarantee there are no aspects of the results needing attention. It is up to the individual to critically assess their own results and, if necessary, seek expert advice.

### **Publication of your CIF in IUCr journals**

A basic structural check has been run on your CIF. These basic checks will be run on all CIFs submitted for publication in IUCr journals (*Acta Crystallographica*, *Journal of Applied Crystallography*, *Journal of Synchrotron Radiation*); however, if you intend to submit to *Acta Crystallographica Section C* or *E* or *IUCrData*, you should make sure that full publication checks are run on the final version of your CIF prior to submission.

### **Publication of your CIF in other journals**

Please refer to the *Notes for Authors* of the relevant journal for any special instructions relating to CIF submission.

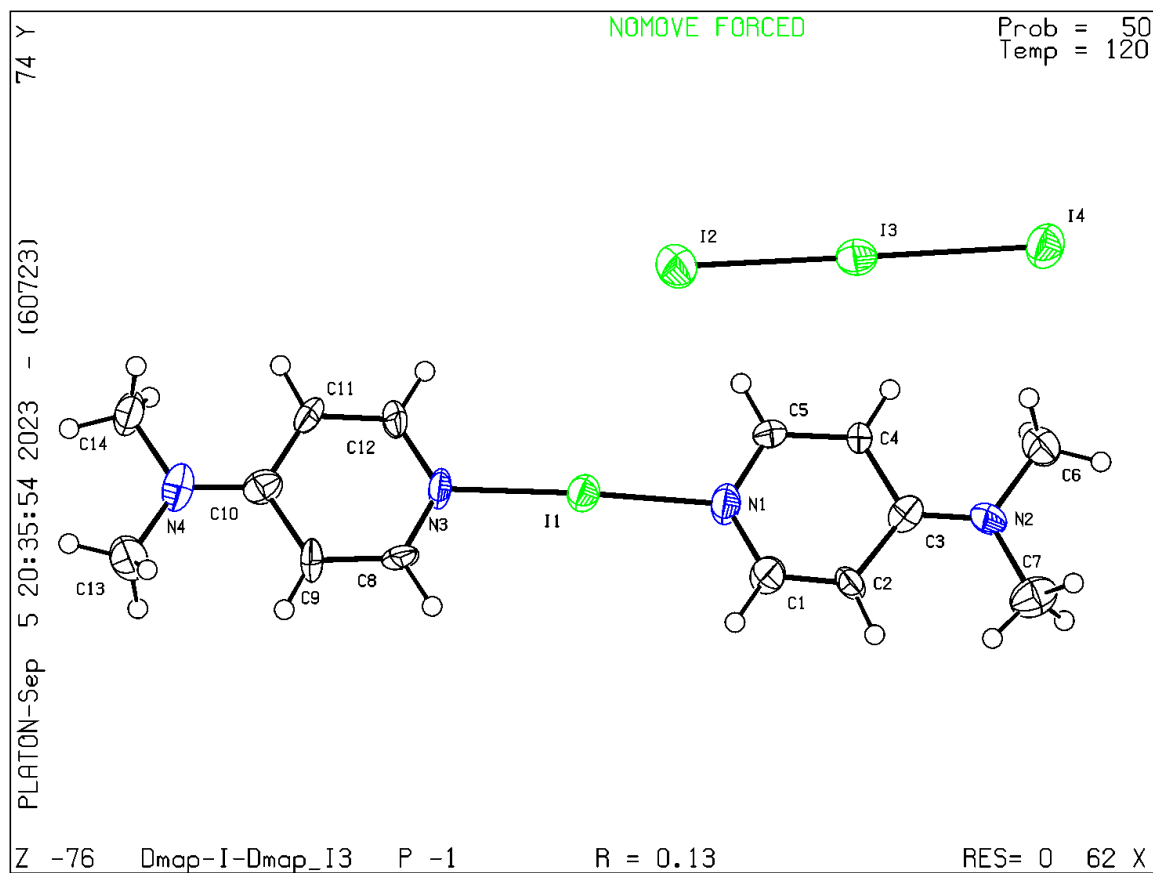

Supplement: Supplementary file 17 [file (Dmap-I-Dmap)I3_checkcif.pdf › Cifs final/(Dmap-I-Dmap)I3_checkcif.pdf]
